# Supplementary material for: Affective Symptoms in Pregnancy are Associated with the Vaginal Microbiome
Source: PubMed Central journal article supplement (PMC11030453; doi:10.1101/2024.04.12.589254), 2024-04-12
Supplement: media-1.pdf [file media-1.pdf]

**Supplemental Table 1. Full Pathway Names of Supper Class in Figure 4**

|           |                                                                                         |
|-----------|-----------------------------------------------------------------------------------------|
| BIO:AAB   | Biosynthesis → Amino Acid Biosynthesis                                                  |
| BIO:CAB   | Biosynthesis → Carboxylic Acid Biosynthesis                                             |
| BIO:CB    | Biosynthesis → Carbohydrate Biosynthesis                                                |
| BIO:CCVB  | Biosynthesis → Cofactor, Carrier, and Vitamin Biosynthesis                              |
| BIO:CSB   | Biosynthesis → Cell Structure Biosynthesis                                              |
| BIO:FALB  | Biosynthesis → Fatty Acid and Lipid Biosynthesis                                        |
| BIO:NNB   | Biosynthesis → Nucleoside and Nucleotide Biosynthesis                                   |
| BIO:PB    | Biosynthesis → Polyprenyl Biosynthesis                                                  |
| BIO:SMB   | Biosynthesis → Secondary Metabolite Biosynthesis                                        |
| BIO:OTHER | Biosynthesis → Other Biosynthesis                                                       |
| DUA:AAAPD | Degradation/Utilization/Assimilation → Amide, Amidine, Amine, and Polyamine Degradation |
| DUA:AD    | Degradation/Utilization/Assimilation → Alcohol Degradation                              |
| DUA:C1CUA | Degradation/Utilization/Assimilation → C1 Compound Utilization and Assimilation         |
| DUA:CD    | Degradation/Utilization/Assimilation → Carbohydrate Degradation                         |
| DUA:INM   | Degradation/Utilization/Assimilation → Inorganic Nutrient Metabolism                    |
| DUA:NND   | Degradation/Utilization/Assimilation → Nucleoside and Nucleotide Degradation            |
| GEN:Ferm  | Generation → Fermentation Generation of Precursor Metabolites and Energy                |
| GEN:PPP   | Generation → Pentose Phosphate Pathways Generation of Precursor Metabolites and Energy  |
| GEN:TCA   | Generation → TCA Generation of Precursor Metabolites and Energy                         |
| MAR:NAP   | Maromolecule → Nucleic Acid Processing Macromolecule Modification                       |
